# Supplementary material for: Transgene CpNAC68 from Wintersweet (Chimonanthus praecox) Improves Arabidopsis Survival of Multiple Abiotic Stresses
Source: MDPI journal article supplement (doi:10.3390/plants10071403), 2021-07-09
Supplement: s1 [file s1]

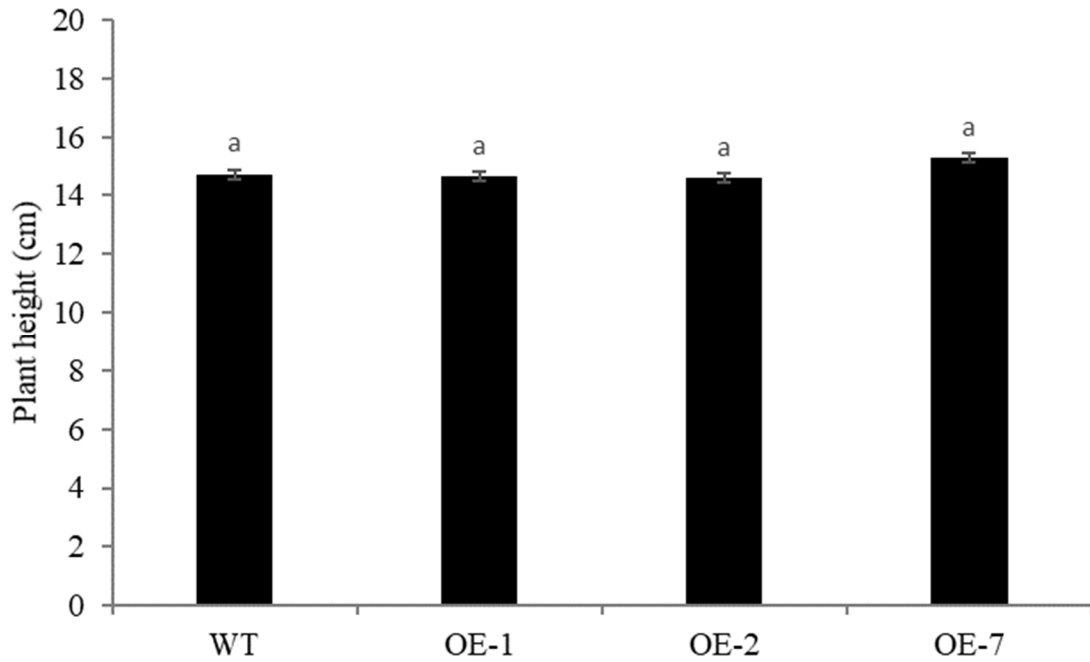

**Figure S1.** Phenotype observation of *CpNAC68* in transgenic Arabidopsis. Plant height of 40-day-old WT and transgenic plants. Data represent the mean  $\pm$  (SE). The significance test was performed by Duncan's multiple range test, and the results of the groups are indicated by the letter at the top of the bars.

**Table S1.** List of primers used in this study.

| Primer Name         | Primer Sequence (5'→3')                                | Purpose                        |
|---------------------|--------------------------------------------------------|--------------------------------|
| <i>CpNAC68</i> -F   | AGAGATCAGCAGCATGGGGAG                                  | cloning of <i>CpNAC68</i> cDNA |
| <i>CpNAC68</i> -R   | GGCATGGCAAGCATACTTGG                                   | cloning of <i>CpNAC68</i> cDNA |
| <i>CpNAC68</i> -qF  | AGGCTTCAGCTGTGGAGAAC                                   | qRT-PCR                        |
| <i>CpNAC68</i> -qR  | TAGGCAGGGAGCAAACAGTG                                   | qRT-PCR                        |
| <i>CpActin</i> -F   | GTTATGGTTGGGATGGGACAGAAAG                              | qRT-PCR                        |
| <i>CpActin</i> -R   | GGGCTTCAGTAAGGAAACAGGA                                 | qRT-PCR                        |
| <i>AtActin</i> -F   | CTTAGGTCTCGGTCGCAG                                     | qRT-PCR                        |
| <i>AtActin</i> -R   | ATCGGTGGTTAGGGACAC                                     | qRT-PCR                        |
| <i>CpNAC68</i> -slF | cggggtaccACTCTCCCAAGATGGATGTGGTG                       | subcellular localization       |
| <i>CpNAC68</i> -slR | gctctagaAAACGGTAGCAGGTTTCATCTGAC                       | subcellular localization       |
| <i>CpNAC68</i> -yF  | ggaattccatagAGAGATCAGCAGCATGGGGAG                      | transactivation activity       |
| <i>CpNAC68</i> -yR  | ataagaatcgggccgcGGCATGGCAAGCATACTTGG                   | transactivation activity       |
| <i>CpNAC68</i> -gF  | GGGGACAAGTTTGTACAAAAAAGCAGGCTAGAGATCAGCAG<br>CATGGGGAG | expression vector construction |
| <i>CpNAC68</i> -gR  | GGGGACCACTTTGTACAAGAAAGCTGGGTGGCATGGCAAGC<br>ATACTTGG  | expression vector construction |
